# Supplementary material
Source: HighWire-hosted journal article supplement (https://qualitysafety.bmj.com/content/bmjqs-2017-006574)
Supplement: inline-supplementary-material-1 [file inline-supplementary-material-1.docx]

**Appendix A.**

Guiding coalition members were exposed to three intervention components: (1) three annual forums to bring together members from all 10 LSL sites; four semiannual, one-day workshops at their own hospitals; and (3) access to a web-based platform that included a repository of project resources and spaces for discussion. This most intensive of these three components were the semiannual in-hospital workshops, detailed below.

| **Leadership Saves Lives Workshop Curriculum** | |
| --- | --- |
| **Structure** | Four semiannual, one-day workshops (6-8 hours each), facilitated by two LSL study team members. The format included lecture-based introduction of the content, followed by learning experiences to encourage engagement and application of the content to each coalition’s context (discussions, cases, simulations, and work sessions). For each hospital, the lead facilitator remained constant and the support facilitator changed with each round of workshops. |
| **Content** | **Focus 1: Building a culture that supports creative problem solving**   - We prepared coalitions to **bring the right perspectives to the table** by providing instruction and learning experiences related to role clarity,[1] working across boundaries,[2 ,3] and working with hierarchy.[4 ,5] - We **pursued full engagement** as guiding coalition members contributed their unique skills and perspectives to a common objective by providing instruction and learning experiences related to leadership and followership,[6] representational groups,[7-9] psychological safety,[10] group decision making,[11] levels of analysis[12 ,13] - We **promoted progress** by providing instruction and learning experiences related to managing conflict[14] and building accountability[15]within the group   **Focus 2: Implementing evidence-based strategies to reduce mortality in patients with AMI**   - We introduced **evidence-based strategies** and aspects of organizational culture associated with lower 30-day RSMR for patients with AMI[16 ,17] - We facilitated the coalition through the **strategic problem solving approach** (defining the problem of AMI mortality, setting and measuring progress toward shared objectives for AMI mortality reduction, identifying and prioritizing of root causes of mortality, and generating and pursuing strategic solutions).[18] - We supported the coalition to apply the **AIDED model** for stick and spread of LSL-related innovations[19] |
| **Application between workshops** | Between workshops, coalitions were expected to take steps to identify, prioritize and address root causes of AMI mortality at their hospitals. At subsequent workshops, they reported on their progress, with the goals of (1) identifying and addressing implementation challenges, and (2) further developing their individual and group leadership capacity. |

References

1. Rizzo JR, House RJ, Lirtzman SI. Role Conflict and Ambiguity in Complex Organizations. Administrative Science Quarterly 1970;15:150-62.

2. Carlile PR. Transferring, translating, and transforming: An integrative framework for managing knowledge across boundaries. Organization Science 2004;15:555-68.

3. Santos FA, Eisenhardt KA. Organizational boundaries and theories of organization. Organization Science 2005;16:491-508.

4. Jaques E. In praise of hierarchy. Harv Bus Rev 1990;68:127-33.

5. Ronay R, Greenaway K, Anicich EM, et al. The path to glory is paved with hierarchy: when hierarchical differentiation increases group effectiveness. Psychol Sci 2012;23:669-77.

6. Berg DN. Resurrecting the muse: followership in organizations. In: Klein EB, Gabelnick F, Herr P, eds. The psychodynamics of leadership. Madison. CT: Psychosocial Press, 1990:27-52.

7. Alderfer CP. An intergroup perspective on group dynamics. In: Lorsch J, ed. Handbook of organizational behavior. Englewood Cliffs, NJ: Prentice Hall, 1987:190-222.

8. Berg DN. Senior executive teams: not what you think. Consult Psychol J: Pract and Res 2005.

9. Curry LA, O'Cathain A, Clark VLP, et al. The Role of Group Dynamics in Mixed Methods Health Sciences Research Teams. Journal of Mixed Methods Research 2012;6:5-20.

10. Nembhard IM, Edmondson AC. Making it safe: The effects of leader inclusiveness and professional status on psychological safety and improvement efforts in health care teams. Journal of Organizational Behavior 2006;27:941-66.

11. Schweiger DM, Sandberg WR. The Utilization of Individual Capabilities in Group Approaches to Strategic Decision-Making. Strategic Management Journal 1989;10:31-43.

12. Alderfer CP. The practice of organizational diagnosis. New York: Oxford University Press, 2011.

13. Berg DN. Levels of analysis: diagnosis & intervention. <http://csms.org/wp-content/uploads/2015/04/Levels-Organizational-Analysis.pdf> (accessed December 7, 2016).

14. Schulz-Hardt S, Jochims M, Frey D. Productive conflict in group decision making: genuine and contrived dissent as strategies to counteract biased information seeking. Organizational Behavior and Human Decision Processes 2002;88:563-86.

15. Mello A. Improving individual member accountability in small work group settings. J Manage Educ 1993;17:253-59.

16. Bradley EH, Curry LA, Spatz ES, et al. Hospital strategies for reducing risk-standardized mortality rates in acute myocardial infarction. Ann Intern Med 2012;156:618-26.

17. Curry LA, Spatz E, Cherlin E, et al. What distinguishes top-performing hospitals in acute myocardial infarction mortality rates? A qualitative study. Ann Intern Med 2011;154:384-90.

18. Banaszak-Hall J, Nembhard I, Taylor L, et al. Leadership and management: a framework for action. In: Burns L, Bradley E, Weiner B, eds. Shortell and Kaluzny’s Healthcare Management: Organization Design and Behavior. New York: Delmar Cengage Learning, 2012:33-63.

19. Bradley EH, Curry LA, Taylor LA, et al. A model for scale up of family health innovations in low-income and middle-income settings: a mixed methods study. BMJ Open 2012;2.
