# Supplementary material
Source: HighWire-hosted journal article supplement (https://qualitysafety.bmj.com/content/bmjqs-2017-006574)
Supplement: inline-supplementary-material-3 [file inline-supplementary-material-3.docx]

**APPENDIX C**

**LSL Interview Guide (for Wave 3 Interviews)**

*We are interested in understanding your hospital’s experience with LSL. We would like your permission to record this interview. This lets us listen carefully to you rather than taking notes and we will accurately capture our conversation. All information will be kept strictly confidential and no identifying information about you or your organization is included on the transcript. Digital files with audio-recorded material will be deleted as soon as the transcripts have been reviewed for accuracy. If at any point you would like me to turn off the recorder, please let me know. You are free to decline to participate, to end our interview at any time for any reason, or to choose to skip any question.*

1. Please describe your role on the LSL project.
2. We are interested in changes in your **implementation of the LSL strategies**. We can go through these in any order you like (share the list to refer to).

- Can you tell me how the change came about?
- What things did you have to work through?
- Were there any surprises along the way?
- Have the changes stuck so far? Tell me about that.

1. What if anything changed in the last year **in terms of aspects of culture?** We can go through these in any order you like (refer to the list).
   - Can you tell me how the change came about?
   - What things did you have to work through?
   - Were there any surprises along the way?
   - Have the changes stuck so far? Tell me about that.
2. Please describe your **experience in the guiding coalition**?
   - What has it been like working in this group over the last year?
   - What kinds of difficulties have had to be worked through?
   - How was that accomplished?
   - How has your experience in the group changed over the course of LSL if at all?

What has been the experience of working with senior management in the last year?

What have they done to promote LSL?

What have they done that has hindered progress?

Have you considered how LSL might apply to other conditions like heart failure or stroke, or to other parts of the hospital?

if so, can you please talk a little about what you are doing or planning to do?

As you know, we are trying to understand how your hospital is experiencing changes in practices or culture that may improve AMI care. Is there anything we have not asked you that we should have?

8. We would be interested in any feedback you would like to share about parts of LSL (**only if time permits at end of interview)**

- LSL workshops (in hospital)
- LSL online community
- Site-led LSL activity (meetings, processes, initiatives) since we last visited
- LSL annual meetings (national – 10 hospitals)
